# Supplementary material for: Comparison of Quality Characteristics of Commercial Kimchi Manufactured in Korea, China, and the United States
Source: MDPI journal article supplement (doi:10.3390/foods10102488), 2021-10-18
Supplement: s1 [file s1]

**Supplementary Table S1.** Information on commercial kimchi manufactured in Korea, China, and **United States**.

1

| Country                | Company<br>(Product name)           | Main Ingredients                                                                                                                                                              |
|------------------------|-------------------------------------|-------------------------------------------------------------------------------------------------------------------------------------------------------------------------------|
| Korea<br>(K-1)         | CJ<br>(Sliced cabbage kimchi)       | Cabbage, radish, red pepper powder, CJ anchovy sauce, CJ paste, CJ salted shrimp, salt, sugar, onion, green onion, garlic, ginger, probiotic broth, fructose                  |
| Korea<br>(K-2)         | Our home<br>(Sliced cabbage kimchi) | Cabbage, radish, kimchi seasoning sauce, pepper powder, anchovy sauce, salted shrimp, garlic, ginger, salt, sugar, onion, green onion, probiotic broth, fructose, MSG         |
| Korea<br>(K-3)         | Daesang<br>(Sliced cabbage kimchi)  | Cabbage, radish, glutinous rice paste, onion, red pepper powder, green onion, anchovy sauce, sugar, garlic, ginger, probiotic, salt                                           |
| Korea<br>(K-4)         | Pulmuone<br>(Sliced cabbage kimchi) | Cabbage, radish, glutinous rice paste, onion, red pepper powder, green onion, anchovy sauce, sugar, garlic, ginger, leek, probiotic, salt                                     |
| Korea<br>(K-5)         | Dongwon<br>(Sliced cabbage kimchi)  | Cabbage, radish, glutinous rice paste, onion, red pepper powder, green onion, anchovy sauce, sugar, garlic, ginger, leek, pear, persimmon, kelp broth, salt, probiotic broth  |
| China<br>(C-1)         | Daesang<br>(Sliced cabbage kimchi)  | Cabbage, radish, red pepper powder, green onion, onion, sugar, garlic, ginger, anchovy sauce, MSG, sorbitol, xanthan gum, corn syrup, leek, probiotic                         |
| China<br>(C-2)         | Pulmuone<br>(Sliced cabbage kimchi) | Cabbage, radish, anchovy sauce, salt, red pepper powder, green onion, onion, sugar, garlic, ginger, xanthan gum, corn syrup, glutinous rice paste, probiotic                  |
| China<br>(C-3)         | NISSI FOOD<br>(Kimchi)              | Cabbage, radish, onion, anchovy sauce, red pepper powder, salt, ginger, malt sugar, xanthan gum                                                                               |
| China<br>(C-4)         | Gyeongbokgung<br>(Kimchi)           | Cabbage, radish, anchovy sauce, onion, green onion, red pepper powder, garlic, ginger, alcohol, citric acid, xanthan gum, food color(turmeric), glutinous rice paste          |
| China<br>(C-5)         | Sankou<br>(Kimchi)                  | Cabbage, radish, anchovy sauce, salted shrimp, salt, sugar, onion, green onion, red pepper powder, garlic, ginger, glutinous rice paste, apple puree, kelp, potassium sorbate |
| United States<br>(U-1) | Mother in law<br>(House kimchi)     | Cabbage, onion, red pepper powder, salt, garlic, ginger, organic sugar, anchovy sauce                                                                                         |
| United States<br>(U-2) | Seoul<br>(Original kimchi)          | Cabbage, red pepper powder, carrot, garlic, green onion, cane sugar, sesame, onion, sea salt, ginger                                                                          |
| United States<br>(U-3) | Wildbrine<br>(Kimchi)               | Cabbage, green onion, sea vegetable, red pepper powder, sea salt, garlic, ginger                                                                                              |
| United States<br>(U-4) | COSMOS<br>(Kimchi)                  | Cabbage, kale, water, carrot, sugar, red pepper powder, garlic, sea salt, ginger, onion                                                                                       |
| United States<br>(U-5) | Mother in law<br>(Vegan)            | Cabbage, onion, welsh onion, red pepper powder, salt, garlic, ginger, organic sugar                                                                                           |
| United States<br>(U-6) | Seoul<br>(Vegan kimchi)             | Cabbage, red pepper powder, carrot, garlic, cane sugar, welch onion, sea salt, ginger                                                                                         |

2
